# Supplementary material for: Ionothermal synthesis, crystal structure, topology and catalytic properties of heterometallic coordination polymers constructed from N-(phosphonomethyl) iminodiacetic acid
Source: Royal Society of Chemistry journal article supplement (doi:10.1039/c5dt02176f), 2015-01-01
Supplement: c5dt02176f1.pdf [file c5dt02176f1.pdf]

# Ionothermal synthesis, crystal structure, topology and catalytic property heterometallic coordination polymers constructed from *N*-(phosphonomethyl)iminodiacetic acid

Ting-Hai Yang,<sup>\* a,c</sup> Ana Rosa Silva<sup>c</sup>, Lianshe Fu<sup>d</sup> and Fa-Nian Shi<sup>\*b,c</sup>

<sup>a</sup> School of Chemistry & Environmental Engineering, Jiangsu University of Technology, Changzhou 23001, P R China. Fax: +86-519-86953269; Tel: +86-519-86953269; E-mail: tinghai\_yang@hotmail.com, fshi96@foxmail.com

<sup>b</sup> School of Science, Shenyang University of Technology, 110870, Shenyang, P R China.

<sup>c</sup> Department of Chemistry, CICECO, University of Aveiro, 3810-193 Aveiro, Portugal.

<sup>d</sup> Department of Physics, CICECO, University of Aveiro, 3810-193 Aveiro, Portugal.

## Supporting Information

### Contents

Fig. S1: The connection structure between Eu atom and  $[\text{Fe}_2(\text{Hpmda})_2]^{2-}$  in compound **1**

Fig. S2: IR of **1**

Fig. S3: IR of **2**

Fig. S4: IR of **3**

Fig. S5: IR of **4**

Fig. S6: TG curves of complexes **1–4**.

Fig. S7: The PXRD patterns of **1** in the different stages of after the 2nd cycle, as-synthesized and the simulated one from the single crystal structure.

Fig. S8: Benzaldehyde conversion vs time and TON vs time for the Knoevenagel condensation with malononitrile at 60°C using the compounds **1–4** in 4.0 mL of toluene performed at the same time using a Radleys carousel.

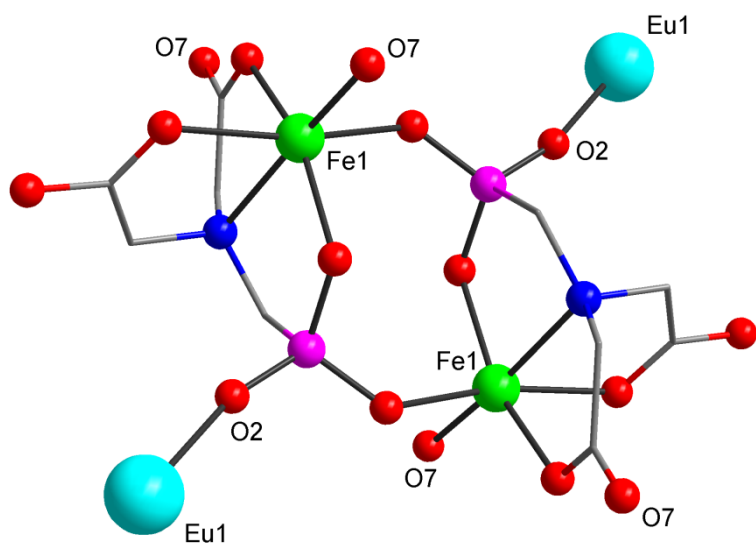

Fig. S1 The connection structure between Eu atom and  $[\text{Fe}_2(\text{Hpmda})_2]^{2-}$  in compound **1**.

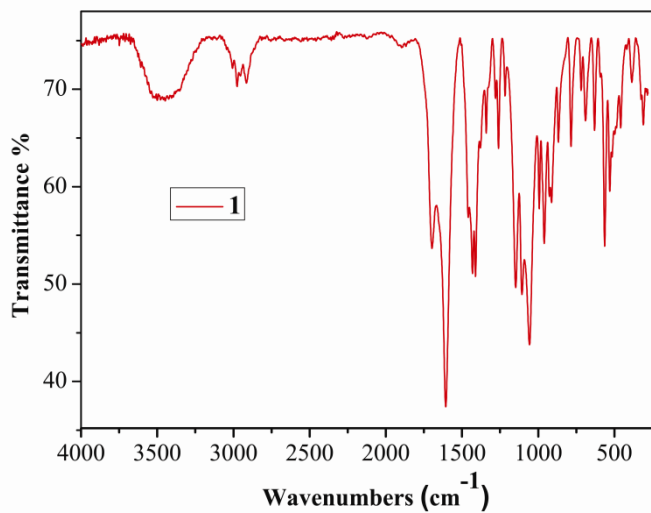

Fig. S2 IR of **1**.

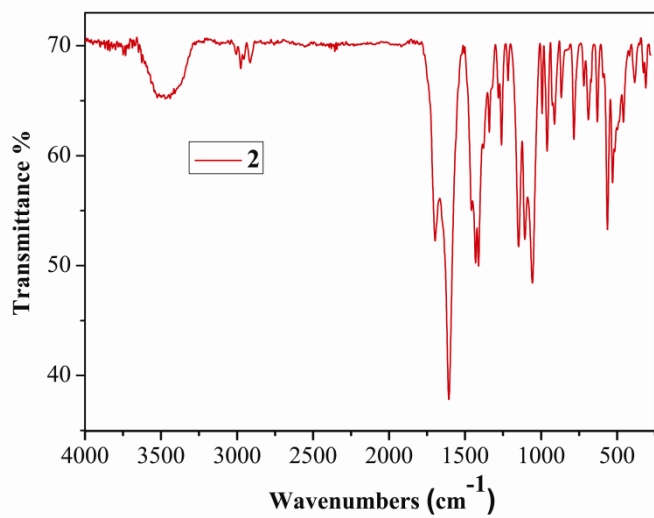

Fig. S3 IR of **2**.

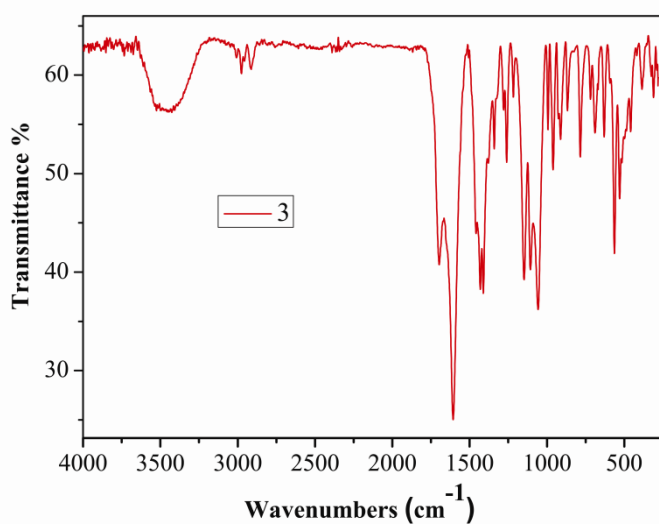

Fig. S4 IR of **3**.

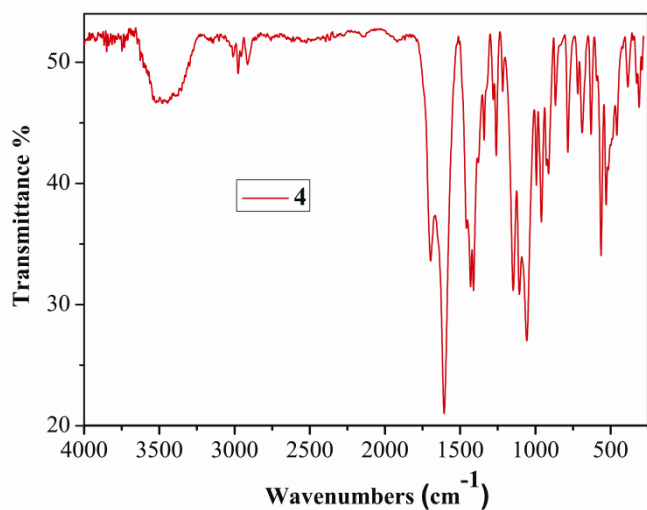

Fig. S5 IR of **4**.

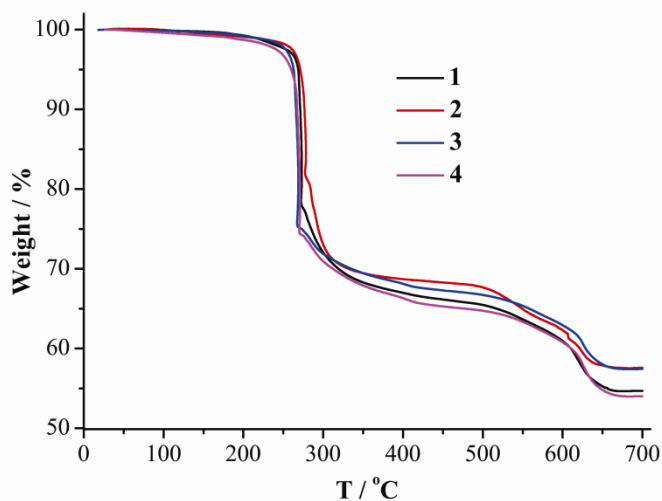

Fig. S6 TG curves of complexes **1–4**.

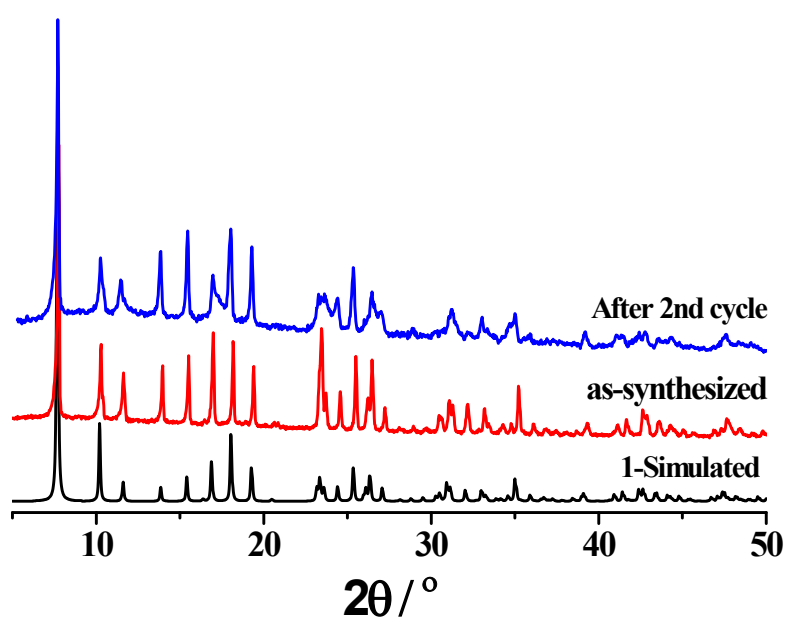

Fig. S7 The PXRD patterns of **1** in the different stages of after the 2nd cycle, as-synthesized and the simulated one from the single crystal structure.

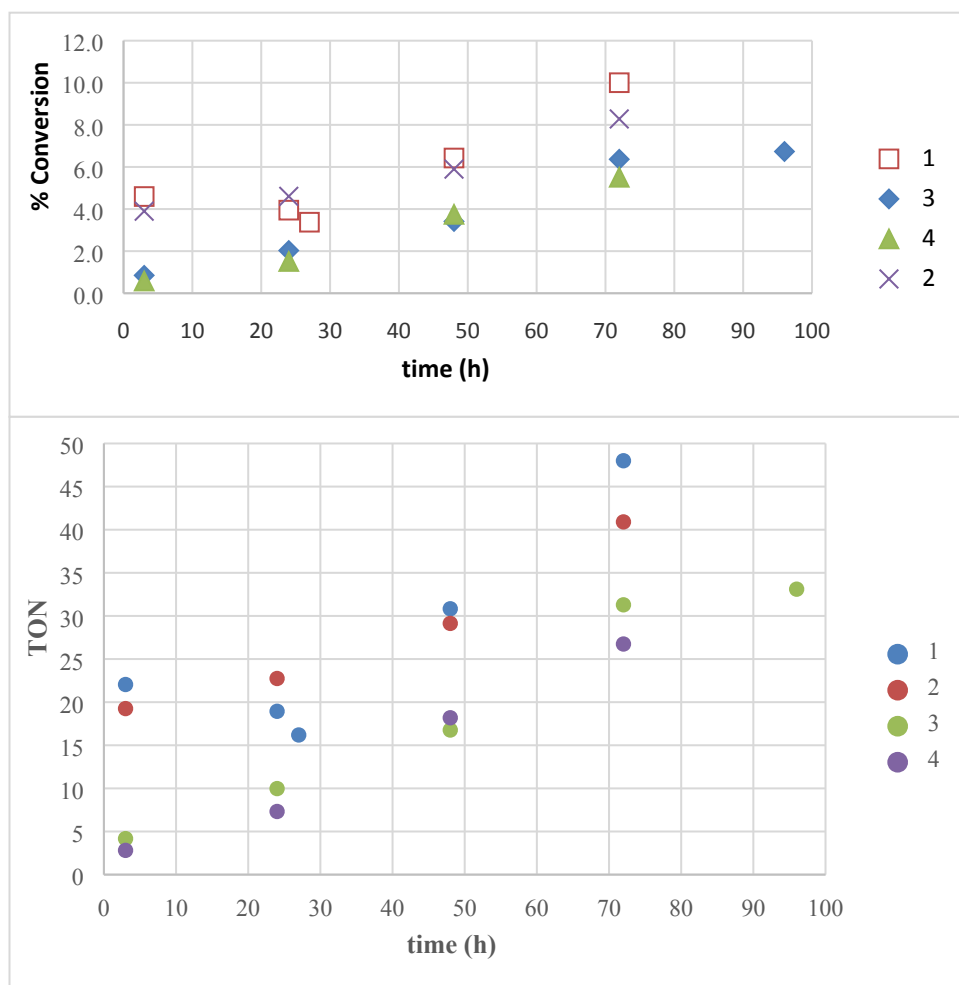

Fig. S8 Benzaldehyde conversion vs time and TON vs time for the Knoevenagel condensation with malononitrile at 60 °C using the compounds **1–4** in 4.0 mL of toluene performed at the same time using a Radleys carousel.

**Table S1** Selected bond lengths (Å) for **1–4**.

|             | <b>1(Eu)</b> | <b>2(Dy)</b> | <b>3(Ho)</b> | <b>4(Y)</b> |
|-------------|--------------|--------------|--------------|-------------|
| Eu(1)-O(2A) | 2.292(4)     | 2.254(5)     | 2.250(5)     | 2.244(4)    |
| Eu(1)-O(2B) | 2.292(4)     | 2.254(5)     | 2.250(5)     | 2.244(4)    |
| Eu(1)-O(2C) | 2.292(4)     | 2.254(5)     | 2.250(5)     | 2.244(4)    |
| Eu(1)-O(2D) | 2.292(4)     | 2.254(5)     | 2.250(4)     | 2.244(4)    |
| Eu(1)-O(2E) | 2.292(4)     | 2.254(5)     | 2.250(4)     | 2.244(4)    |
| Eu(1)-O(2)  | 2.292(4)     | 2.254(5)     | 2.250(5)     | 2.244(4)    |
| Fe(1)-O(1)  | 2.127(4)     | 2.120(5)     | 2.120(5)     | 2.120(4)    |
| Fe(1)-O(6)  | 2.121(5)     | 2.123(6)     | 2.121(5)     | 2.114(4)    |
| Fe(1)-O(7F) | 2.102(5)     | 2.103(6)     | 2.101(5)     | 2.102(4)    |
| Fe(1)-O(3G) | 2.141(5)     | 2.154(5)     | 2.155(5)     | 2.143(4)    |
| Fe(1)-O(4)  | 2.218(5)     | 2.205(6)     | 2.209(6)     | 2.206(4)    |
| Fe(1)-N(1)  | 2.250(5)     | 2.256(6)     | 2.258(6)     | 2.251(5)    |
| Fe(2)-O(3)  | 2.283(5)     | 2.257(6)     | 2.275(5)     | 2.267(4)    |
| Fe(2)-O(3C) | 2.283(5)     | 2.257(6)     | 2.275(5)     | 2.267(4)    |
| Fe(2)-O(3D) | 2.283(5)     | 2.257(6)     | 2.275(5)     | 2.267(4)    |
| Fe(2)-O(6A) | 2.479(5)     | 2.432(6)     | 2.406(3)     | 2.447(2)    |
| Fe(2)-O(6B) | 2.479(5)     | 2.432(6)     | 2.406(3)     | 2.447(2)    |
| Fe(2)-O(6G) | 2.479(5)     | 2.432(6)     | 2.406(3)     | 2.447(2)    |
| P(1)-O(1)   | 1.540(4)     | 1.546(5)     | 1.545(5)     | 1.545(4)    |
| P(1)-O(2)   | 1.505(4)     | 1.503(5)     | 1.502(5)     | 1.510(4)    |
| P(1)-O(3)   | 1.517(5)     | 1.512(5)     | 1.517(5)     | 1.513(4)    |
| P(1)-C(1)   | 1.817(6)     | 1.823(7)     | 1.817(7)     | 1.816(6)    |

Symmetry codes: A:  $x-y+1/3, x-1/3, -z+5/3$ ; B:  $y+1/3, -x+y+2/3, -z+5/3$ ; C:  $-x+y+1, -x+1, z$ ; D:  $-y+1, x-y, z$ ; E:  $-x+4/3, -y+2/3, -z+5/3$ ; F:  $-y+2, x-y+1, z$ ; G:  $-x+5/3, -y+4/3, -z+4/3$ .

**Table S2** Selected bond angles [°] for **1–4**.

|                   | <b>1(Eu)</b> | <b>2(Dy)</b> | <b>3(Ho)</b> | <b>4(Y)</b> |
|-------------------|--------------|--------------|--------------|-------------|
| O(2A)-Eu(1)-O(2B) | 88.57(16)    | 88.78(19)    | 88.91(19)    | 88.68(15)   |
| O(2A)-Eu(1)-O(2C) | 180.00(18)   | 180.0(2)     | 180.000(1)   | 180.000(1)  |
| O(2B)-Eu(1)-O(2C) | 91.43(16)    | 91.22(19)    | 91.09(19)    | 91.32(15)   |
| O(2A)-Eu(1)-O(2D) | 91.43(17)    | 91.22(19)    | 91.09(19)    | 91.32(15)   |
| O(2B)-Eu(1)-O(2D) | 179.998(1)   | 179.998(1)   | 180.0(2)     | 180.00(17)  |
| O(2C)-Eu(1)-O(2D) | 88.57(16)    | 88.78(19)    | 88.91(19)    | 88.68(15)   |
| O(2A)-Eu(1)-O(2E) | 88.57(17)    | 88.78(19)    | 88.91(19)    | 88.68(15)   |
| O(2B)-Eu(1)-O(2E) | 88.57(16)    | 88.78(19)    | 88.91(19)    | 88.68(15)   |
| O(2C)-Eu(1)-O(2E) | 91.43(16)    | 91.22(19)    | 91.09(19)    | 91.32(15)   |
| O(2D)-Eu(1)-O(2E) | 91.43(17)    | 91.22(19)    | 91.09(19)    | 91.32(15)   |
| O(2A)-Eu(1)-O(2)  | 91.43(17)    | 91.22(19)    | 91.09(19)    | 91.32(15)   |
| O(2B)-Eu(1)-O(2)  | 91.43(17)    | 91.22(19)    | 91.09(19)    | 91.32(15)   |
| O(2C)-Eu(1)-O(2)  | 88.57(17)    | 88.78(19)    | 88.91(19)    | 88.68(15)   |
| O(2D)-Eu(1)-O(2)  | 88.57(16)    | 88.78(19)    | 88.91(19)    | 88.68(15)   |
| O(2E)-Eu(1)-O(2)  | 179.998(1)   | 179.998(1)   | 180.0(2)     | 180.00(17)  |
| O(7F)-Fe(1)-O(6)  | 114.28(19)   | 114.9(2)     | 114.9(2)     | 115.00(16)  |
| O(7F)-Fe(1)-O(1)  | 87.08(17)    | 86.2(2)      | 86.3(2)      | 86.14(15)   |
| O(6)-Fe(1)-O(1)   | 158.64(18)   | 158.9(2)     | 158.8(2)     | 158.86(15)  |
| O(7F)-Fe(1)-O(3G) | 89.79(19)    | 89.8(2)      | 89.6(2)      | 89.65(16)   |
| O(6)-Fe(1)-O(3G)  | 81.37(18)    | 80.6(2)      | 80.6(2)      | 80.79(16)   |
| O(1)-Fe(1)-O(3G)  | 99.29(17)    | 99.9(2)      | 100.00(19)   | 100.03(15)  |
| O(7F)-Fe(1)-O(4)  | 93.73(19)    | 93.5(2)      | 93.9(2)      | 94.10(16)   |
| O(6)-Fe(1)-O(4)   | 86.00(19)    | 86.1(2)      | 86.1(2)      | 85.92(17)   |
| O(1)-Fe(1)-O(4)   | 93.15(18)    | 93.5(2)      | 93.2(2)      | 93.13(15)   |
| O(3G)-Fe(1)-O(4)  | 167.24(19)   | 166.4(2)     | 166.5(2)     | 166.54(16)  |
| O(7F)-Fe(1)-N(1)  | 165.43(19)   | 165.0(2)     | 165.0(2)     | 165.03(17)  |
| O(6)-Fe(1)-N(1)   | 77.15(18)    | 77.2(2)      | 77.3(2)      | 77.27(16)   |
| O(1)-Fe(1)-N(1)   | 81.81(17)    | 82.1(2)      | 81.8(2)      | 81.90(15)   |
| O(3G)-Fe(1)-N(1)  | 101.24(18)   | 101.5(2)     | 101.3(2)     | 101.24(17)  |
| O(4)-Fe(1)-N(1)   | 77.58(18)    | 77.9(2)      | 77.9(2)      | 77.68(16)   |
| O(3C)-Fe(2)-O(3)  | 112.35(13)   | 110.64(16)   | 109.56(15)   | 111.20(12)  |
| O(3C)-Fe(2)-O(3D) | 112.35(13)   | 110.64(16)   | 109.56(15)   | 111.20(12)  |
| O(3)-Fe(2)-O(3D)  | 112.35(12)   | 110.64(15)   | 109.56(15)   | 111.20(12)  |

Symmerty codes: A:  $x-y+1/3, x-1/3, -z+5/3$ ; B:  $y+1/3, -x+y+2/3, -z+5/3$ ; C:  $-x+y+1, -x+1, z$ ; D:  $-y+1, x-y, z$ ; E:  $-x+4/3, -y+2/3, -z+5/3$ ; F:  $-y+2, x-y+1, z$ ; G:  $-x+5/3, -y+4/3, -z+4/3$ .
